# Supplementary material for: Increasing Mental Health Care Access, Continuity, and Efficiency for Veterans Through Telehealth With Video Tablets
Source: Atypon-hosted journal article supplement (doi:10.1176/appi.ps.201900104), 2019-08-05
Supplement: appi.ps.201900104.ds001.pdf [file appi.ps.201900104.ds001.pdf]

**ICD-9 Codes of mental health diagnosis inclusion criteria<sup>1</sup>**

| <b>Diagnosis Category</b>               | <b>ICD-9 Codes</b>                                               |
|-----------------------------------------|------------------------------------------------------------------|
| Alcohol and Drug Psychosis              | 291.0-291.9<br>292.0-292.9                                       |
| Schizophrenic psychoses                 | 295.00-295.95                                                    |
| Affective psychoses                     | 296.00-296.06<br>296.10-296.16<br>296.20-296.36<br>296.40-296.99 |
| Paranoid state psychoses                | 297.0-297.9                                                      |
| Other nonorganic psychoses              | 298.0-298.9                                                      |
| Neurotic Disorders                      | 300.00-300.9                                                     |
| Personality Disorders                   | 301.0-301.9                                                      |
| Alcohol dependence                      | 303.0 -303.93                                                    |
| Drug dependence                         | 304.00-304.99                                                    |
| Nondependent abuse of drugs             | 305.00-305.93                                                    |
| Special symptoms or syndromes           | 307.1-307.59                                                     |
| Adult reaction to stress                | 308.0-308.9                                                      |
| Adjustment reaction, including PTSD     | 309.0-309.9                                                      |
| Depressive disorder                     | 311                                                              |
| Mental disorders diagnosed in childhood | 312.00-312.9<br>314.00-314.9                                     |

<sup>1</sup> After October 1, 2015, mapped ICD-10 codes were used.

**CPT Code inclusion list to define a psychotherapy visit**

| <b>CPT Code</b> | <b>CPT Description</b>                                                                                                                                                                                                                                                           |
|-----------------|----------------------------------------------------------------------------------------------------------------------------------------------------------------------------------------------------------------------------------------------------------------------------------|
| 90791           | PSYCHIATRIC DIAGNOSTIC EVALUATION                                                                                                                                                                                                                                                |
| 90832           | PSYCHOTHERAPY, 30 MINUTES WITH PATIENT                                                                                                                                                                                                                                           |
| 90834           | PSYCHOTHERAPY, 45 MINUTES WITH PATIENT                                                                                                                                                                                                                                           |
| 90837           | PSYCHOTHERAPY, 60 MINUTES WITH PATIENT                                                                                                                                                                                                                                           |
| 90839           | PSYCHOTHERAPY FOR CRISIS; IRST 60 MINUTES                                                                                                                                                                                                                                        |
| 90847           | FAMILY PSYCHOTHERAPY (CONJOINT PSYCHOTHERAPY) (WITH PATIENT PRESENT), 50 MINUTES                                                                                                                                                                                                 |
| 90849           | MULTIPLE-FAMILY GROUP PSYCHOTHERAPY                                                                                                                                                                                                                                              |
| 90853           | GROUP PSYCHOTHERAPY (OTHER THAN OF A MULTIPLE-FAMILY GROUP)                                                                                                                                                                                                                      |
| 99078           | PHYSICIAN OR OTHER QUALIFIED HEALTH CARE PROFESSIONAL QUALIFIED BY EDUCATION, TRAINING, LICENSURE/REGULATION (WHEN APPLICABLE) EDUCATIONAL SERVICES RENDERED TO PATIENTS IN A GROUP SETTING (EG, PRENATAL, OBESITY, OR DIABETIC INSTRUCTIONS) OBESITY, OR DIABETIC INSTRUCTIONS) |
| 99509           | HOME VISIT FOR ASSISTANCE WITH ACTIVITIES OF DAILY LIVING AND PERSONAL CARE                                                                                                                                                                                                      |
| 99510           | HOME VISIT FOR INDIVIDUAL, FAMILY, OR MARRIAGE COUNSELING                                                                                                                                                                                                                        |
| H0004           | BEHAVIORAL HEALTH COUNSELING AND THERAPY, PER 15 MINUTES                                                                                                                                                                                                                         |
| H0005           | ALCOHOL AND/OR DRUG SERVICES; GROUP COUNSELING BY A CLINICIAN                                                                                                                                                                                                                    |
| H0015           | ALCOHOL AND/OR DRUG SERVICES; INTENSIVE OUTPATIENT (TREATMENT PROGRAM THAT OPERATES AT LEAST 3 HOURS/DAY AND AT LEAST 3 DAYS/WEEK AND IS BASED ON AN INDIVIDUALIZED TREATMENT PLAN), INCLUDING ASSESSMENT, COUNSELING; CRISIS INTERVENTION, AND ACTIVITY THERAPIES OR EDUCATION  |
| H0015           | ALCOHOL AND/OR DRUG SERVICES; INTENSIVE OUTPATIENT (TREATMENT PROGRAM THAT OPERATES AT LEAST 3 HOURS/DAY AND AT LEAST 3 DAYS/WEEK AND IS BASED ON AN INDIVIDUALIZED TREATMENT PLAN), INCLUDING ASSESSMENT, COUNSELING; CRISIS INTERVENTION, AND ACTIVITY THERAPIES OR EDUCATION  |
| H0031           | MENTAL HEALTH ASSESSMENT, BY NON-PHYSICIAN                                                                                                                                                                                                                                       |
| H0036           | COMMUNITY PSYCHIATRIC SUPPORTIVE TREATMENT, FACE-TO-FACE, PER 15 MINUTES                                                                                                                                                                                                         |
| H2011           | CRISIS INTERVENTION SERVICE, PER 15 MINUTES                                                                                                                                                                                                                                      |
| H2017           | PSYCHOSOCIAL REHABILITATION SERVICES, PER 15 MINUTES                                                                                                                                                                                                                             |
| H2027           | PSYCHOEDUCATIONAL SERVICE, PER 15 MINUTES                                                                                                                                                                                                                                        |
| S9445           | PATIENT EDUCATION, NOT OTHERWISE CLASSIFIED, NON-PHYSICIAN PROVIDER, INDIVIDUAL, PER SESSION                                                                                                                                                                                     |
| S9446           | PATIENT EDUCATION, NOT OTHERWISE CLASSIFIED, NON-PHYSICIAN PROVIDER, GROUP, PER SESSION                                                                                                                                                                                          |

**Definition of medication management encounter**

Veterans with MH or SUD diagnoses who had at least one E& M-coded visit (CPT codes: 90792, 90863, 99202, 99203, 99204, 99205, 99213, 99214, 99215, 99342, 99343, 99344, 99345, 99348, 99349, 99350, 99442, 99443, 99605, 99606, 99607) with a psychiatrist or at least one E& M-coded visit with another qualifying prescriber in a MH clinic. E& M visits include office visits, home visits and telephone visits. Other prescribers include personclass codes corresponding with non-psychiatrist MDs (Other MH MD), Clinical Pharmacists (Pharmacist), Physician Assistants (MH PA), Clinical Nurse Specialists (MH CNS) or Nurse Practitioners (MH NP) on the Person Code Report. E& M visits with non-psychiatrist prescribers count only if coupled with the following clinic stops: 156, 157, 292, 500 to 503, 505, 506, 509, 510, 512 to 521, 523 to 527, 531 to 542, 545 to 548, 550 to 568, 571 to 584, 586 to 589, 593 to 599, 713.

**Sample Sizes flow diagram for all analyses**

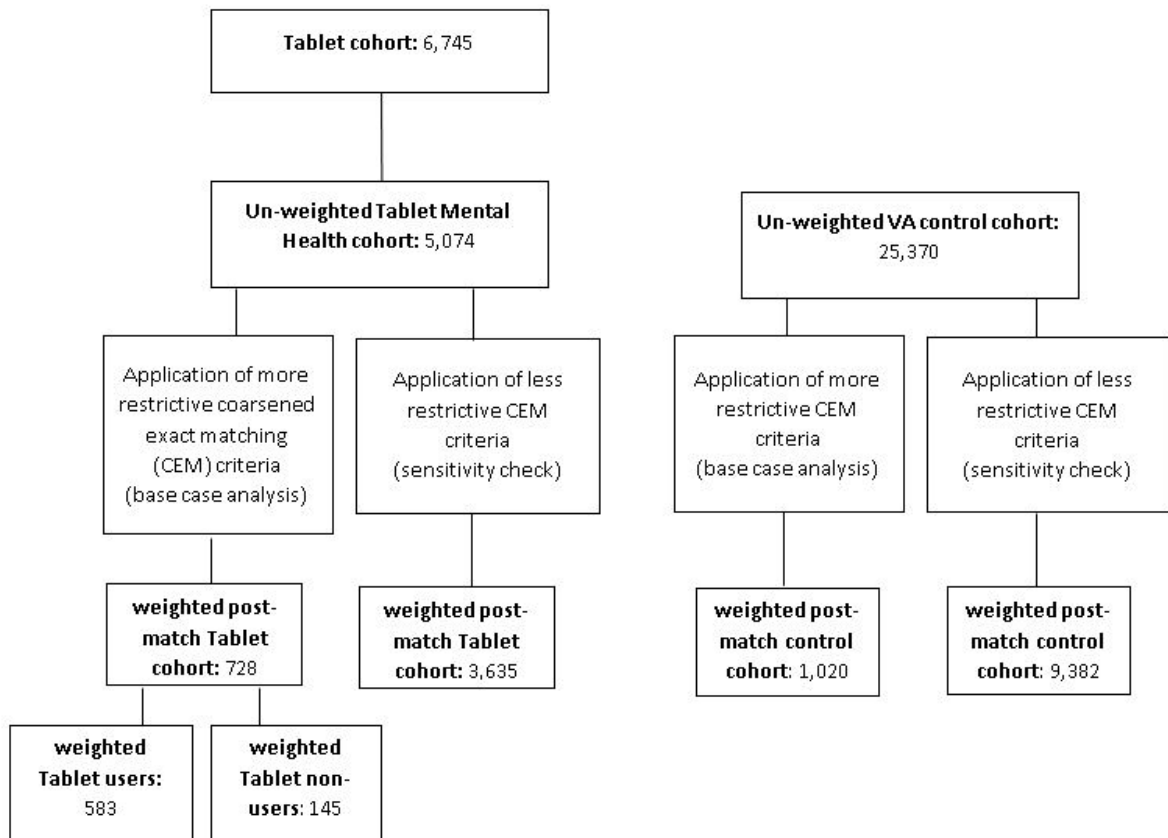

**Descriptive overview of tablet users vs. non-users (weighted)**

|                                                           | <b>Tablet used</b><br>Mean/% | <b>Tablet not used</b><br>Mean/% | p     |
|-----------------------------------------------------------|------------------------------|----------------------------------|-------|
| <b>Age (M ± SD)</b>                                       | 58.34 ± 14.17                | 61.07 ± 14.78                    | <.001 |
| <b>Sex (male=1) (%)</b>                                   | 95.27%                       | 93.28%                           | <.001 |
| <b>Race (%)</b>                                           |                              |                                  |       |
| <b>Hispanic</b>                                           | 5.30%                        | 5.04%                            | 0.71  |
| <b>Non-Hispanic White</b>                                 | 79.73%                       | 76.47%                           | 0.002 |
| <b>Non-Hispanic Black</b>                                 | 11.55%                       | 15.97%                           | <.001 |
| <b>Other</b>                                              | 3.41%                        | 2.52%                            | .030  |
| <b>LTE coverage (%)</b>                                   | 98.85%                       | 99.26%                           | <.001 |
| <b>Rurality (%)</b>                                       |                              |                                  |       |
| <b>Urban</b>                                              | 57.95%                       | 63.87%                           | .020  |
| <b>Rural</b>                                              | 39.96%                       | 34.45%                           | .065  |
| <b>Highly rural</b>                                       | 2.08%                        | 1.68%                            | .002  |
| <b>Drive distance to primary care (&gt;40 miles) (%)</b>  | 5.11%                        | 6.72%                            | .269  |
| <b>Drive distance to primary care (M ± SD)</b>            | 16.39 ± 14.50                | 15.07 ± 14.08                    | .138  |
| <b>Chronic conditions (%)†</b>                            |                              |                                  |       |
| <b>Zero</b>                                               | 3.79%                        | 3.36%                            | .479  |
| <b>1 to 2</b>                                             | 18.94%                       | 19.33%                           | .348  |
| <b>3 or more</b>                                          | 77.27%                       | 77.31%                           | .294  |
| <b>No. of baseline psychotherapy visits (M ± SD)</b>      | 2.11 ± 8.00                  | 1.95 ± 6.75                      | .010  |
| <b>No. 3 month baseline psychotherapy visits (M ± SD)</b> | .38 ± .89                    | .42 ± 1.19                       | .632  |
| <b>Baseline MH diagnoses (%)</b>                          |                              |                                  |       |
| <b>PTSD</b>                                               | 9.09%                        | 12.61%                           | <.001 |
| <b>SUD</b>                                                | 46.40%                       | 31.93%                           | .095  |
| <b>Depression</b>                                         | 10.61%                       | 13.45%                           | .158  |
| <b>SMI</b>                                                | 54.73%                       | 52.10%                           | <.001 |
| <b>New mental health diagnosis (%)</b>                    | 14.20%                       | 11.76%                           | .864  |
| <b>2 or more mental health diagnoses (%)</b>              | 35.61%                       | 23.53%                           | <.001 |
| <b>No. Baseline MH encounters (M ± SD)</b>                | 8.91 ± 14.45                 | 8.02 ± 14.35                     | <.001 |
| <b>SuicideRiskFlag (%)</b>                                | 1.89%                        | 1.68%                            | <.001 |
| <b>n</b>                                                  | 583                          | 145                              |       |

† From list of 34 chronic conditions

LTE = Long Term Evolution, MH = Mental Health, SMI = Serious Mental Illness, PTSD = Post Traumatic Stress Disorder, SUD = Substance Use Disorder, Suicide risk flag = VHA-based algorithm identifying patients at high-risk for suicide

**Baseline and follow-up outcomes for tablet users, non-users, and control cohort (weighted)**

|                                                  | Baseline          |                 |                   | Follow up         |                 |                   |
|--------------------------------------------------|-------------------|-----------------|-------------------|-------------------|-----------------|-------------------|
|                                                  | Tablet used       | Tablet not used | Control           | Tablet used       | Tablet not used | Control           |
| <b>No. Psychotherapy visits (M ± SD)</b>         | 0.71 ± 1.68       | 1.14 ± 5.31     | .62 ± 3.14        | 2.82 ± 6.99       | 0.79 ± 2.03     | .30 ± 1.27        |
| <b>No. Medication management visits (M ± SD)</b> | 1.72 ± 2.19       | 1.12 ± 1.36     | 1.21 ± 2.15       | 1.93 ± 2.52       | 1.24 ± 3.43     | .36 ± 1.36        |
| <b>SAIL Measure met (Yes=1) (%)</b>              | 3.43%             | 2.07%           | 3.64%             | 24.19%            | 6.21%           | 2.55%             |
| <b>Missed opportunity rate (M ± SD %)</b>        | 29.00% ±<br>30.10 | 25.85% ± 30.44  | 30.13% ±<br>33.35 | 27.30% ±<br>28.04 | 30.7% ± 34.10   | 50.01% ±<br>45.34 |
| <b>Any ED visit (Yes=1) (%)</b>                  | 12.01%            | 10.34%          | 8.09%             | 16.98%            | 17.93%          | 11.51%            |
| <b>No. of ED visits (M ± SD)</b>                 | .31 ± 1.30        | .22 ± .93       | .21 ± 1.18        | .41 ± 1.37        | .42 ± 1.18      | .27 ± 1.36        |
| <b>n</b>                                         | 583               | 145             | 1,020             | 583               | 145             | 1,020             |
